# Supplementary material for: Characterization of medical device constituents and development of duration-based non-cancer threshold of toxicological concern values
Source: Front Toxicol. 2025 Jun 4;7:1600127. doi: 10.3389/ftox.2025.1600127 (PMC12175843; doi:10.3389/ftox.2025.1600127)
Supplement: Supplementary file 2 [file Supplementaryfile2.xlsx]

## Sheet: Sheet1
CAS No.	Compound Name	Criteria Not Met- Reason for Removal
100-40-3	Cyclohexene, 4-ethenyl-	No Tox Data
100-50-5	3-Cyclohexene-1-carboxaldehyde	No Tox Data
101-68-8	Methylene diphenyl diisocyanate	No Tox Data
101-83-7	Aminodicyclohexane	Genotox risk
101-77-9	Benzenamine, 4,4'-methylenebis	Genotox risk
10191-41-0	α-tocopherol	Read-across
10213-78-2	2,2'-(Octadecylimino)diethanol	Read-across
10233-13-3	Dodecanoic acid, 1-methylethyl ester	Read-across
10250-45-0	2,6-dimethyl-4-heptanol, acetate	No Tox Data
10258-54-5	Acetic acid, cyano-, 2-methoxyethyl ester	No Tox Data
102-86-3	1-Hexanamine, N,N-dihexyl-	No Tox Data
103-09-3	2-ethylhexyl acetate	Read-across
103-82-2	Benzeneacetic acid	No Tox Data
104-50-7	2(3H)-Furanone, 5-butyldihydro-	Read-across
104-61-0	gamma-nonanolactone	Read-across
104-66-5	Benzene, 1,1'-[1,2-ethanediylbis(oxy)]bis-	Genotox risk
105-56-6	Ethyl cyanoacetate	No Tox Data
105-57-7	1,1-diethoxyethane	No Tox Data
105-59-9	N-methyldiethanolamine (MDEA)	No Tox Data
105-67-9	Phenol, 2,4-dimethyl-	No Tox Data
105-82-8	Propane, 1,1'-[ethylidenebis(oxy)]bis-	No Tox Data
106-14-9	12-Hydroxystearic acid	Read-across
106-32-1	Ethyl octanoate	Read-across
106-42-3	p-Xylene	Read-across
106-65-0	Butanedioic acid, dimethyl ester	Read-across
106-88-7	1,2-epoxybutane	Genotox risk
106-91-2	Glycidyl methacrylate	Genotox risk
106-97-8	Butane	No Tox Data
106-99-0	1,3-butadiene	Genotox risk
107-01-7	2-Butene	No Tox Data
107-10-8	Propylamine	Read-across
107-52-8	Hexasiloxane, tetradecamethyl-	Read-across
107-71-1	Lupersol 70	Genotox risk
107-83-5	Pentane, 2-methyl	No Tox Data
107-92-6	Butanoic acid	Read-across
108-05-4	vinyl acetate	Genotox risk
108-11-2	4-methyl-2-pentanol (MIBC)	Read-across
108-21-4	Isopropyl acetate	Read-across
108-38-3	Benzene, 1,3-dimethyl-	Read-across
108-86-1	Bromobenzene	No Tox Data
108-93-0	cyclohexanol	Read-across
109-02-4	4,4-Methylenedimorpholine	Read-across
109-17-1	Tetraethyleneglycol dimethacrylate	No Tox Data
109-43-3	Dibutyl sebacate	Read-across
109-52-4	Pentanoic acid	No Tox Data
109-73-9	butylamine	Read-across
110-15-6	Butanedioic acid	Read-across
110-33-8	Dihexyl hexanedioate	Read-across
110-82-7	Cyclohexane	No Tox Data
110-91-8	Morpholine	Read-across
110-94-1	Pentanedioic acid	Read-across
111-11-5	Octanoic acid, methyl ester	Read-across
111-16-0	Pimelic acid	No Tox Data
111-30-8	Glutaraldehyde	Genotox risk
1113-21-9	1,6,10,14-Hexadecatetraen-3-ol, 3,7,11,15-tetramethyl-, (E,E)-	No Tox Data
111-45-5	Ethanol, 2-(2-propenyloxy)-	Genotox risk
111-57-9	stearoylethanolamide	Read-across
111-76-2	2-butoxy-ethanol	No Tox data
111-86-4	1-Octylamine	Read-across
111-87-5	1-Octanol	Read-across
1119-40-0	Pentanedioic acid, dimethyl ester	No Tox Data
1120-36-1	1-Tetradecene	Read-across
112-07-2	2-Butoxyethyl acetate	Read-across
1120-72-5	Cyclopentanone, 2-methyl-	No Tox Data
112-11-8	9-Octadecenoic acid (9Z)-, 1-methylethyl ester	Read-across
112-18-5	1-Dodecanamine, N,N-dimethyl-	Read-across
112-31-2	Decanal	Read-across
112-37-8	Undecanoic acid	No Tox Data
1123-85-9	Phenethyl alcohol, β-methyl-	No Tox data
112-39-0	Hexadecanoic acid, methyl ester	Read-across
112-40-3	Dodecane	Read-across
112-41-4	1-Dodecene	Read-across
112-42-5	1-Undecanol	Read-across
112-52-7	1-chlorododecane	Genotox risk
112-60-7	Tetraethylene glycol	No Tox data
112-61-8	Methyl stearate	Read-across
112-75-4	1-Tetradecanamine, N,N-dimethyl-	No Tox Data
112-69-6	Dimethylhexadecylamine	Read-across
112-77-6	9-Octadecenoyl chloride, (9Z)-	No Tox Data
112-88-9	1-Octadecene	Read-across
112-91-4	9-Octadecenenitrile, (Z)-	Read-across
112-95-8	Eicosane	Read-across
1135-66-6	2H-2,4a-Methanonaphthalene, 1,3,4,5,6,7-hexahydro-1,1,5,5-tetramethyl-, (2S)-	Read-across
115-99-1	1,6-Octadien-3-ol, 3,7-dimethyl-, formate	No Tox Data
117-96-4	Diatrizoic acid	No Tox Data
118-56-9	Homosalate	Read-across
1189-08-8	1,3-Butylene glycol dimethacrylate	Read-across
120-18-3	2-Naphthalenesulfonic acid	Read-across
120-40-1	Dodecanamide, N,N-bis(2-hydroxyethyl)-	Read-across
120-80-9	catechol	Genotox risk
120-92-3	Cyclopentanone	No Tox Data
120-95-6	Phenol, 2,4-bis(1,1-dimethylpropyl)-	No Tox Data
121-32-4	3-ethoxy-4-hydroxybenzaldehyde (ethylvanillin)	Genotox risk
121-34-6	Vanillic acid	No Tox data
121-44-8	Triethylamine	No Tox data
122-00-9	Ethanone, 1-(4-methylphenyl)-	Read-across
122-03-2	Benzaldehyde, 4-(1-methylethyl)-	No Tox Data
122-62-3	bis(2-ethylhexyl) sebacate	Read-across
123-07-9	Phenol, 4-ethyl-	Genotox risk
123-56-8	Succinimide	No Tox data
123-86-4	Acetic acid, butyl ester	No Tox data
123-99-9	Azelaic acid	Read-across
124-07-2	Octanoic acid	Read-across
124-10-7	Methyl tetradecanoate	Read-across
124-13-0	Octanal	Read-across
124-17-4	Butyl carbitol acetate	Read-across
124-19-6	Nonanal	Read-across
124-26-5	Octadecanamide	Read-across
124-28-7	Octadecanamine, N,N'-dimethyl-	Read-across
124-76-5	Isoborneol	Read-across
129-00-0	Pyrene	Genotox risk
130066-57-8	Bis[4-(vinyloxy)butyl] isophthalate	No Tox data
13402-02-3	hexadecyl acrylate	Read-across
13466-78-9	3-Carene	No Tox Data
13475-82-6	2,2,4,6,6-pentamethylheptane	Read-across
134-81-6	Ethanedione, diphenyl-	No Tox Data
136-77-6	1,​3-​Benzenediol, 4-​hexyl-	No Tox Data
138-86-3	Limonene	No Tox Data
13887-98-4	3,6,9-Trioxaundecanedioic acid	No Tox Data
141-04-8	Diisobutyl adipate	Read-across
141-05-9	diethylmaleate	No Tox Data
141-24-2	Methyl ricinoleate	No Tox Data
141-79-7	3-Penten-2-one, 4-methyl-	No Tox Data
142-18-7	Glyceryl monolaurate	Read-across
142-31-4	N-octyl sulfate	Read-across
142-91-6	Isopropyl palmitate	Read-across
143-08-8	1-Nonanol	Read-across
143-13-5	Acetic acid, nonyl ester	No Tox Data
143-27-1	1-Hexadecylamine	No Tox Data
1459-93-4	1,3-Benzenedicarboxylic acid, dimethyl ester	Read-across
14901-07-6	3-Buten-2-one, 4-(2,6,6-trimethyl-1-cyclohexen-1-yl)-	No Tox Data
150-13-0	4-Aminobenzoic acid	Genotox risk
150-78-7	Benzene, 1,4-dimethoxy-	No Tox Data
1559-34-8	Tetraethylene glycol monobutyl ether	Read-across
15625-89-5	Trimethylolpropane triacrylate	Genotox risk
1569-01-3	1-Propoxy-2-propanol	Read-across
1569-02-4	1-Ethoxy-2-propanol	No Tox Data
15790-86-0	2-Pentenoic acid, 4-methyl-, ethyl ester, (E)-	No Tox Data
1599-67-3	1-Docosene	No Tox Data
1643-20-5	lauryldimethylamine oxide	Read-across
1675-54-3	bisphenol A diglycidyl ether (BADGE)	Genotox risk
16958-92-2	Ditridecyl adipate	Read-across
1726-23-4	Trimellitic acid tri-n-butyl ester	Read-across
1732-08-7	Dimethyl pimelate	No Tox Data
17418-58-5	Disperse Red 60	Read-across
17831-71-9	2-Propenoic acid, oxybis(2,1-ethanediyloxy-2,1-ethanediyl) ester	No Tox Data
18268-70-7	1,1′-[Oxybis(2,1-ethanediyloxy-2,1-ethanediyl)] bis(2-ethylhexanoate)	Read-across
1962-75-0	Dibutyl terephthalate	Read-across
19780-11-1	2-Dodecen-1-yl(-)succinic anhydride	Read-across
2052-15-5	Butyl Levulinate	Read-across
2094-98-6	1,1'-Azobis(cyclohexanecarbonitrile)	No Tox Data
22047-49-0	2-Ethylhexyl stearate	Read-across
2206-43-1	4-Methoxy-1,3-benzenedicarboxylic acid	No Tox Data
2219-82-1	2-tert-Butyl-6-methylphenol	No Tox Data
2358-84-1	Diethylene glycol bis(methacrylate)	Read-across
2387-03-3	2-hydroxynaphthalene-1-carbaldehyde [(2-hydroxy-1-naphthyl)methylene]hydrazine	Genotox risk
2396-61-4	3,3′-Oxybis[1-propanol]	No Tox Data
2403-89-6	1,2,2,6,6-Pentamethyl-4-piperidinol	Read-across
2409-55-4	Phenol, 2-(1,1-dimethylethyl)-4-methyl-	No Tox Data
2425-77-6	1-Decanol, 2-hexyl	Read-across
2425-79-8	Oxirane, 2,2'-[1,4-butanediylbis(oxymethylene)]bis-	Genotox risk
2426-08-6	Oxirane, (butoxymethyl)-	Genotox risk
24293-43-4	1,1′-Bis(2-ethylhexyl) 2,2′-thiobis[acetate]	No Tox Data
2432-87-3	Dioctyl sebacate	No Tox Data
24544-04-5	Benzenamine, 2,6-bis(1-methylethyl)-	No Tox Data
2460-77-7	2,5-di-tert-butyl-1,4-benzoqionone	No Tox Data
2461-15-6	[[(2-ethylhexyl)oxy]methyl]-oxirane	Read-across
24650-42-8	2,2-Dimethoxy-2-phenylacetophenone	Read-across
2499-95-8	n-Hexyl acrylate	Read-across
2530-83-8	Silane, trimethoxy[3-(oxiranylmethoxy)propyl]-	Genotox risk
25811-35-2	Pentaerythritol tetraenanthate	Read-across
2700-30-3	N,N-Diisopropylformamide	No Tox Data
2756-56-1	Isobornyl propanoate	Read-across
27689-12-9	Bisphenol A bis(3-methacryloyloxypropyl) ether	No Tox Data
2772-45-4	Phenol, 2,4-bis(1-methyl-1-phenylethyl)-	No Tox Data
2915-57-3	Succinic acid, di(2-ethylhexyl) ester	Read-across
3061-75-4	Docosanamide	Read-across
30673-36-0	Decanoic acid, butyl ester	No Tox Data
3077-12-1	Diethylol-p-toluidine	Read-across
3126-80-5	Tetrakis(2-ethylhexyl) pyromellitate	Read-across
328-39-2	Leucine	No Tox Data
3290-92-4	Trimethylolpropane trimethacrylate	Genotox risk
33100-27-5	15-Crown-5	No Tox Data
3332-27-2	Myristamine oxide	Read-across
334-48-5	Decanoic acid	Read-across
36528-28-6	Dodecanoic acid, decyl ester	Read-across
Furaneol	3658-77-3	Genotox risk
375-73-5	Perfluorobutanesulfonic acid	No Tox Data
37942-07-7	3,5-Di-tert-butyl-2-hydroxybenzaldehyde	No Tox Data
3796-70-1	5,9-Undecadien-2-one, 6,10-dimethyl-	No Tox Data
4219-49-2	Hexadecanoic acid, 2-hydroxyethyl ester	Read-across
4253-34-3	Methyltriacetoxysilane	Read-across
4390-04-9	Nonane, 2,2,4,4,6,8,8-heptamethyl-	Read-across
475-20-7	Longifolene	No Tox Data
50-00-0	Formaldehyde	Genotox risk
50-21-5	Lactic acid	Read-across
502-42-1	Cycloheptanone	No Tox Data
502-44-3	2-Oxepanone	No Tox Data
502-69-2	2-Pentadecanone, 6,10,14-trimethyl-	No Tox Data
502-97-6	1,4-Dioxane-2,5-dione	No Tox Data
505-48-6	Octanedioic acid	No Tox Data
506-30-9	Eicosanoic acid	Read-across
51-17-2	1H-Benzimidazole	Read-across
5124-30-1	Hydrogenated diphenylmethane diisocyanate	No Tox Data
51-67-2	4-(2-Aminoethyl)phenol	No Tox Data
51756-09-3	Pentanoic acid, 2-acetyl-4-methyl-, methyl ester	No Tox Data
52338-87-1	1,3-bis [3 (dimethylamino)propyl]urea	Read-across
526-75-0	Phenol, 2,3-dimethyl-	No Tox Data
526-95-4	D-gluconic acid	Read-across
539-88-8	Ethyl Levulinate	Read-across
540-10-3	Cetyl palmitate	Read-across
540-51-2	Ethanol, 2-bromo-	No Tox Data
544-35-4	Ethyl linoleate	No Tox Data
544-76-3	Hexadecane	Read-across
554-95-0	1,3,5-Benzenetricarboxylic acid	No Tox Data
555-43-1	tristearin	Read-across
555-45-3	Trimyristin	Read-across
57-08-9	6-Acetylaminohexanoic acid	No Tox Data
57-10-3	n-Hexadecanoic acid	Read-across
57-11-4	Octadecanoic acid	Read-across
578-54-1	Benzenamine, 2-ethyl-	No Tox Data
584-84-9	Benzene, 2,4-diisocyanato-1-methyl-	Read-across
589-18-4	Benzenemethanol, 4-methyl-	No Tox Data
59-02-9	alpha-Tocopherol	Read-across
59227-88-2	N-Octylcaprolactam	No Tox Data
593-45-3	Octadecane	Read-across
593-51-1	methylamine hydrochloride	No Tox Data
5989-54-8	(S)-p-mentha-1,8-diene	Read-across
60-32-2	6-Aminohexanoic acid	No Tox Data
606-28-0	Benzoic acid, 2-benzoyl-, methyl ester	Genotox risk
6066-82-6	2,5-Pyrrolidinedione, 1-hydroxy-	No Tox Data
610-09-3	Cis-1,2-cyclohexanedicarboxylic acid	No Tox Data
617-45-8	Aspartic acid	No Tox Data
617-94-7	Benzenemethanol, .alpha.,.alpha.-dimethyl-	No Tox Data
62268-47-7	Acetic acid, 2,2′-dithiobis-, bis(2-ethylhexyl) ester	No Tox Data
623-84-7	1,2-Propanediol, diacetate	Read-across
62782-03-0	Tinuvin 780	No Tox Data
627-91-8	Monomethyl adipate	No Tox Data
627-93-0	Dimethyl Adipate	Read-across
628-89-7	Ethanol, 2-(2-chloroethoxy)-	Read-across
628-97-7	Hexadecanoic acid, ethyl ester	Read-across
629-15-2	1,2-Ethanediol, diformate	Read-across
629-50-5	Tridecane	Read-across
629-59-4	Tetradecane	Read-across
629-62-9	Pentadecane	Read-across
629-73-2	1-Hexadecene	Read-across
629-78-7	Heptadecane	Read-across
629-97-0	Docosane	Read-across
64-18-6	formic acid	Read-across
643-79-8	1,2-Benzenedicarboxaldehyde	Genotox risk
6606-59-3	Hexamethylene dimethacrylate	No Tox Data
6607-34-7	1,4,7-Trioxacyclotridecane-8,13-dione	No Tox Data
66-25-1	Hexanal	Genotox risk
6728-26-3	Trans-hex-2-enal	Genotox risk
67-63-0	Isopropyl Alcohol	No Tox Data
693-36-7	Irganox PS 802	No Tox Data
696-59-3	Tetrahydro-2,5-dimethoxyfuran	No Tox Data
69851-61-2	Irganox 1019	Read-across
701-97-3	Cyclohexanepropanoic acid	No Tox Data
706-14-9	γ-Decalactone	Read-across
7085-85-0	Ethyl 2-cyanoacrylate	No Tox Data
71500-39-5	Hexanoic acid, 3,5,5-trimethyl-, methyl ester	No Tox Data
7400-08-0	p-Coumaric acid	No Tox Data
74-87-3	Chloromethane	No Tox data
75-07-0	Acetaldehyde	Genotox risk
75-21-8	Ethylene oxide	Genotox risk
75-28-5	Isobutane	No Tox Data
75-31-0	2-propanamine	No Tox Data
75-37-6	Ethane, 1,1-difluoro-	No Tox Data
75-85-4	Amylene hydrate	No Tox Data
75-91-2	tert-Butyl Hydroperoxide	Genotox risk
760-23-6	1-Butene, 3,4-dichloro-	Genotox risk
765-69-5	1,3-Cyclopentanedione, 2-methyl-	No Tox Data
77-53-2	Cedrol	Genotox risk
77-94-1	Tributyl citrate	Read-across
78-93-3	2-Butanone	No Tox Data
791-28-6	Phosphine oxide, triphenyl-	No Tox Data
79-20-9	methyl acetate	Read-across
79-31-2	isobutyric acid	Read-across
79-41-4	methacrylic acid	Read-across
80-56-8	alpha-Pinene	Read-across
816-19-3	Hexanoic acid, 2-ethyl-, methyl ester	No Tox Data
822-06-0	1,6-hexamethylene diisocyanate	No tox data
826-36-8	2,2,6,6-Tetramethyl-4-piperidinone	No tox data
830-13-7	Cyclododecanone	No tox data
831-82-3	Phenol, 4-phenoxy-	No tox data
85-52-9	2-benzoylbenzoic acid	Genotox risk
85-68-7	Benzyl butyl phthalate	Genotox risk
872-50-4	1-methyl-2-pyrrolidone	No tox data
88-14-2	2-Furancarboxylic acid	No tox data
88-26-6	3,5-di-tert-Butyl-4-hydroxybenzyl alcohol	No tox data
88-27-7	2,6-di-tert-Butyl-4-(dimethylaminomethyl)phenol	Read-across
90-12-0	Naphthalene, 1-methyl-	No tox data
90-50-6	2-Propenoic acid, 3-(3,4,5-trimethoxyphenyl)-	No tox data
91-08-7	Benzene, 1,3-diisocyanato-2-methyl-	No Tox Data
91-21-4	Tetrahydroisoquinoline	No Tox Data
91-57-6	Naphthalene, 2-methyl-	No Tox Data
930-68-7	2-Cyclohexen-1-one	No Tox Data
93-54-9	Benzenemethanol, α-ethyl-	No Tox Data
93-83-4	Oleic acid diethanolamide	No Tox Data
939-48-0	Benzoic acid, 1-methylethyl ester	Read-across
94-53-1	Heliotropic acid	No Tox Data
94-60-0	1,4-cyclohexanedicarboxylic acid, dimethyl ester	Genotox risk
94-70-2	Benzenamine, 2-ethoxy-	No Tox Data
95-16-9	Benzothiazole	No Tox Data
95-53-4	o-Toluidine	Genotox risk
95-63-6	1,2,4-trimethylbenzene	Read-across
95-87-4	Phenol, 2,5-dimethyl-	Genotox risk
97-77-8	Tetraethylthiuram disulfide	Read-across
98-53-3	Cyclohexanone, 4-(1,1-dimethylethyl)-	No Tox Data
98-55-5	α-Terpineol	Read-across
98-66-8	4-Chlorobenzenesulfonic acid	No Tox Data
98-73-7	Benzoic acid, p-tert-butyl-	Genotox risk
995-83-5	Pentasiloxane, 1,1,3,3,5,5,7,7,9,9-decamethyl-	No Tox Data
99-97-8	Benzenamine, N,N,4-trimethyl-	Genotox risk
77-68-9	Propanoic acid, 2-methyl-, 3-hydroxy-2,2,4-trimethylpentyl ester	No Tox Data
493-01-6	Naphthalene, decahydro-, cis-	No Tox Data
493-02-7	Naphthalene, decahydro-, trans-	No Tox Data
871-70-5	Octadecanedioic acid	No Tox Data
80-39-7	Benzenesulfonamide, N-ethyl-4-methyl-	No Tox Data
589-68-4	Monomyristin	No Tox Data
85763-57-1	11-Methyldodecanol	No Tox Data
3586-39-8	2,2,4-Trimethyladipic acid	No Tox Data
150-30-1	DL-Phenylalanine	No Tox Data
141-28-6	diethyl adipate	No Tox Data
13235-36-4	Tetrasodium EDTA	No Tox Data
123-01-3	Dodecylbenzene	No Tox Data
627-82-7	Diglycerol	No Tox Data
6069-98-3	Cyclohexane, 1-methyl-4-(1-methylethyl)-, cis-	No Tox Data
1678-82-6	Cyclohexane, 1-methyl-4-(1-methylethyl)-, trans-	No Tox Data
3452-07-1-	1-Eicosene	Read-across
127-43-5	1-Penten-3-one, 1-(2,6,6-trimethyl-1-cyclohexen-1-yl)-	No Tox Data
2235-46-3	N,N-Diethylacetoacetamide	Read-across
20407-84-5	2-Dodecenal, (E)-	No Tox Data
872-05-9	1-Decene	Read-across
123-38-6	Propanal	No Tox Data
91-68-9	3-diethylaminophenol	Read-across
111-65-9	Octane	Read-across
7147-34-4	Tri(2-ethylhexyl) citrate	No Tox Data
1852-04-6	Undecanedioic acid	Read-across
1892-29-1	2,2′-Dithiodiethanol	Genotox risk
79-06-1	Acrylamide	Genotox risk
79-10-7	Acrylic acid	Genotox risk
107-02-8	Acrolein	Genotox risk
20545-92-0	Undecylenamide monoethanolamide	No Tox Data
105-81-7	Thiourea, N-(2-hydroxyethyl)-N'-2-propen-1-yl-	No Tox Data
106-48-9	4-Chlorophenol	No Tox Data
131-56-6	Uvinul 400	Read-across
118-55-8	Phenyl salicylate	No Tox Data
54-12-6	(±)-Tryptophan	No Tox Data
106-33-2	Dodecanoic acid, ethyl ester	No Tox Data
120-12-7	Anthracene	No Tox Data
86-73-7	Fluorene	No Tox Data
83-32-9	Acenaphthene	No Tox Data
292-64-8	Cyclooctane	No Tox Data
2591-86-8	1-formyl-piperidine	No Tox Data
74-83-9	Bromomethane	Genotox risk
4245-37-8	Vinyl methacrylate	No Tox Data
78-79-5	Isoprene	No Tox Data
60-35-5	Acetamide	No Tox Data
3147-75-9	Tinuvin 329	No Tox Data
13393-93-6	Tetrahydroabietyl alcohol	No Tox Data
77-85-0	1,3-Propanediol, 2-(hydroxymethyl)-2-methyl-	No Tox Data
576-26-1	2,6-Dimethylphenol	Read-across
119-13-1	δ-tocopherol	No Tox Data
65-71-4	Thymine	No Tox Data
96-14-0	3-Methyl pentane	Read-across
18425-64-4	Trimethylolpropane diglycidyl ether	No Tox Data
123-72-8	Butanal	No Tox Data
26086-33-9	Trimethylolpropane tris(2-ethylhexanoate)	No Tox Data
5420-17-7	Tetrahydrofurfuryl oleate	No Tox Data
4813-57-4	Octadecyl acrylate	Read-across
1733-93-3	Triethanolamine monododecyl ether	No Tox Data
45164-10-1	Undecanesulfonic acid	No Tox Data
112-30-1	1-Decanol	Read-across
2725-22-6	Cyasorb UV-1164	Read-across
109-21-7	Butyl butyrate	No Tox Data
592-35-8	Butyl carbamate	No Tox Data
814-29-9	Tributylphosphine oxide	No Tox Data
143356-43-8	Tetrapropylpropanediamide	No Tox Data
75-04-7	Ethanamine	No Tox Data
2365-48-2	Methyl 2-mercaptoacetate	No Tox Data
35542-01-9	Uridine, 5-methoxy-	No Tox Data
68-11-1	Thioglycolic acid	Read-across
100-02-7	p-Nitrophenol	No Tox Data
100-47-0	Benzonitrile	No Tox Data
102-79-4	Butyldiethanolamine	Read-across
103-49-1	Dibenzylamine	No Tox Data
10438-94-5	1,2-Propanediol, 3-(octyloxy)-	No Tox Data
10473-13-9	2,3-Dimethyl-3-buten-2-ol	No Tox Data
10482-56-1	2-[(1S)-4-methylcyclohex-3-en-1-yl]propan-2-ol	Read-across
105-39-5	Ethyl Chloroacetate	No Tox Data
105-95-3	1,4-Dioxacycloheptadecane-5,17-dione	Read-across
10597-60-1	4-(2-hydroxyethyl)benzene-1,2-diol	No Tox Data
106-50-3	1,4-Benzenediamine	Genotox risk
106-51-4	1,4-Benzoquinone	Genotox risk
106-89-8	epichlorohydrin	Genotox risk
107-13-1	Acrylonitrile	Genotox risk
107-29-9	Acetaldoxime	No Tox data
107-31-3	methyl formate	No Tox Data
107-59-5	tert-butyl 2-chloroacetate	No Tox Data
1078-19-9	6-Methoxy-1-tetralone	No Tox Data
107-87-9	2-Pentanone	No Tox Data
108-42-9	m-Chloroaniline	No Tox data
108-48-5	2,6- dimethylpyridine	No Tox Data
109-92-2	Ethyl vinyl ether	No Tox Data
110-03-2	2,5-dimethylhexane-2,5-diol	No Tox Data
111-44-4	Bis(2-chloroethyl) ether	Genotox risk
111-58-0	Oleoylethanolamide	No Tox Data
111-67-1	2-octene	Read-across
111-80-8	2-Nonynoic acid methyl ester	No Tox Data
111-92-2	Dibutylamine	No Tox Data
1120-48-5	Dioctylamine	No Tox Data
1120-49-6	N-decyldecan-1-amine	No Tox Data
1123-25-7	1-Methylcyclohexylcarboxylic acid	No Tox Data
112-47-0	1,10-decanediol	Read-across
1137-42-4	4-Hydroxybenzophenone	Genotox risk
115-96-8	Tris(2-chloroethyl) phosphate	No Tox Data
118-10-5	Cinchonine	No Tox Data
118-92-3	2-Aminobenzoic acid	No Tox Data
119-53-9	Benzoin	No Tox Data
119-84-6	3,4-Dihydrocoumarin	No Tox Data
122-32-7	Glycerol trioleate	No Tox Data
122-57-6	Benzylideneacetone	Genotox risk
124-22-1	Dodecylamine	No Tox Data
13171-00-1	Crysolide	No Tox Data
13175-44-5	1-octene-8-ol	No Tox Data
13360-63-9	N-ethylbutan-1-amine	No Tox Data
134-96-3	4-hydroxy-3,5-dimethoxybenzaldehyde	No Tox Data
136954-20-6	3-Mercaptohexyl acetate	No Tox Data
142-28-9	1,3-dichloropropane	No Tox Data
142-96-1	Butyl ether	No Tox Data
143-07-1	Lauric acid	No Tox Data
144-62-7	Oxalic Acid	Read-across
1472-93-1	dimethyl octadecanedioate	Read-across
1477-42-5	4-methyl-1,3-benzothiazol-2-amine	No Tox Data
149330-25-6	2-[3-(2-hydroxyethylamino)-2-methylanilino]ethanol	No Tox Data
151-13-3	Butyl ricinoleate	No Tox Data
156-38-7	4-Hydroxyphenylacetic acid	No Tox Data
1571-08-0	Methyl 4-formylbenzoate	No Tox Data
15721-78-5	Benzenamine, 4-(1,1,3,3-tetramethylbutyl)-N-[4-(1,1,3,3-tetramethylbutyl)phenyl]-	Read-across
15958-68-6	1,5-Bis(cyclohexylamino)-9,10-anthracenedione	No Tox Data
15965-99-8	Glycidyl hexadecyl ether	No Tox Data
1604-34-8	6,10-dimethylundecan-2-one	No Tox Data
1678-25-7	N-Phenylbenzenesulfonamide	No Tox Data
17159-79-4	Ethyl 4-oxocyclohexanecarboxylate	No Tox Data
17540-75-9	2,6-Di-tert-butyl-4-sec-butylphenol	No Tox Data
1821-12-1	4-Phenylbutanoic acid	No Tox Data
18299-85-9	Behenyl acrylate	Read-across
183322-16-9	Ethyl 3,4-bis(2-methoxyethoxy)benzoate	No Tox Data
18835-33-1	1-Hexacosene	Read-across
1999-85-5	Alpha,Alpha'-Dihydroxy-1,3-Diisopropylbenzene	Read-across
2016-42-4	N-Tetradecylamine	No Tox Data
22071-15-4	2-(3-benzoylphenyl)propanoic acid	No Tox Data
2215-77-2	4-Phenoxybenzoic acid	No Tox Data
2628-17-3	4-Vinylphenol	Genotox risk
281-23-2	Adamantane	No Tox Data
2835-99-6	4-Amino-3-methylphenol	Genotox risk
307-34-6	Perfluorooctane	No Tox Data
3089-17-6	2,9-Dichloroquinacridone	No Tox Data
313482-99-4	triethoxysilylmethyl anthracene-9-carboxylate	No Tox Data
321-14-2	5-Chlorosalicylic acid	No Tox Data
3249-68-1	Ethyl 3-oxohexanoate	No Tox Data
32634-68-7	Ditoluoyltartaric Acid	No Tox Data
3391-86-4	1-Octen-3-ol	No Tox Data
355-02-2	Perfluoro(methylcyclohexane)	No Tox Data
3687-45-4	Oleyl oleate	Read-across
39192-49-9	3,5-Bis(acetyloxy)benzoyl chloride	No Tox Data
422-05-9	2,2,3,3,3-Pentafluoro-1-propanol	No Tox Data
4247-02-3	2-methylpropyl 4-hydroxybenzoate	No Tox Data
4299-07-4	2-butyl-1,2-benzisothiazolin-3-one (BBIT)	No Tox Data
4435-53-4	3-methoxybutyl acetate	Read-across
488-43-7	D-Glucamine	No Tox Data
501-94-0	4-Hydroxybenzeneethanol	No Tox Data
504-02-9	1,3-Cyclohexanedione	No Tox Data
50-45-3	2,3-dichlorobenzoic acid	No Tox Data
507-20-0	t-butyl chloride	No Tox Data
530-62-1	1,1'-Carbonyldiimidazole	Read-across
5335-05-7	chloromethyl benzoate	No Tox Data
5393-81-7	2-hydroxydecanoic acid	No Tox Data
540-84-1	2,2,4-Trimethylpentane	Read-across
541-91-3	3-Methylcyclopentadecanone	No Tox Data
5459-93-8	N-Ethylcyclohexylamine	No Tox Data
547-63-7	Methyl isobutyrate	No Tox Data
5538-95-4	N-Dodecyl-1,3-propanediamine	No Tox Data
565-61-7	2-Pentanone, 3-methyl-	No Tox Data
590-01-2	Propanoic acid, butyl ester	No Tox Data
60-19-5	Tyramine hydrochloride	No Tox Data
60-27-5	Creatinine	No Tox Data
614-45-9	tert-butyl benzenecarboperoxoate	Genotox risk
61-54-1	2-(1H-indol-3-yl)ethanamine	No Tox Data
619-66-9	4-Formylbenzoic acid	No Tox Data
6196-98-1	6-(1-phenylethyl)-1,2,3,4-tetrahydronaphthalene	No Tox Data
619-86-3	Benzoic Acid, 4-ethoxy-	No Tox Data
621-59-0	3-Hydroxy-4-methoxybenzaldehyde	No Tox Data
621-76-1	Tripropyl Orthoformate	No Tox Data
623-43-8	Methyl E-crotonate	No Tox Data
62-53-3	Aniline	Genotox risk
625-50-3	N-ethylacetamide	No Tox Data
626-67-5	1-Methylpiperidine	No Tox Data
62-76-0	Sodium Oxalate	No Tox Data
629-70-9	Hexadecyl acetate	No Tox Data
6606-65-1	1-Butyl 2-cyanoacrylate	No Tox Data
66204-44-2	3,3-Methylene-bis-(5-methyloxazolidine)	Genotox risk
66-27-3	Methyl methanesulfonate	Genotox risk
6789-88-4	hexyl benzoate	No Tox Data
701920-77-6	1,4-Bis[2-(2-butoxyethoxy)ethyl] butanedioate	No Tox Data
71301-98-9	ethyl (2R)-2-(4-hydroxyphenoxy)propanoate	No Tox Data
7328-17-8	2-(2-Ethoxyethoxy)ethyl acrylate	Genotox risk
74-11-3	4-chlorobenzoic acid	No Tox Data
7417-21-2	2-(3,4-Dimethoxyphenyl)ethanol	No Tox Data
75-25-2	Bromoform	Genotox risk
75-83-2	2,2-dimethylbutane	Read-across
76-09-5	Tetramethylethylene glycol	No Tox Data
769-78-8	Vinyl benzoate	No Tox Data
7803-49-8	Hydroxylamine	No Tox Data
78-26-2	2-Methyl-2-propyl-1,3-propanediol	No Tox Data
785-30-8	4,4′-Diaminobenzanilide	No Tox Data
79-33-4	L-Lactic acid	No Tox Data
79815-20-6	(S)-Indoline-2-carboxylic acid	No Tox Data
82941-26-2	(2-Butoxyethoxy)acetic acid	No Tox Data
83883-25-4	4-(6-Hydroxyhexyloxy)benzoic acid	No Tox Data
85-01-8	Phenanthrene	No Tox Data
87-13-8	Diethyl (ethoxymethylene)malonate	No Tox Data
87-61-6	1,2,3-Trichlorobenzene	Genotox risk
87-62-7	2,6-Dimethylaniline	Genotox risk
88-18-6	Phenol, 2-(1,1-dimethylethyl)-	No Tox Data
89-86-1	2,4 dihydroxybenzoic acid	No Tox Data
90-05-1	Guaiacol	Genotox risk
90-27-7	2-Phenylbutyric acid	No Tox Data
929-59-9	2-[2-(2-aminoethoxy)ethoxy]ethanamine	No Tox Data
93-28-7	Acetyleugenol	No Tox Data
93-53-8	2-Phenylpropionaldehyde	No Tox Data
94-26-8	4-Hydroxybenzoic acid butyl ester	No Tox Data
95-73-8	2,4-Dichlorotoluene	No Tox Data
959-26-2	Bis(2-hydroxyethyl) terephthalate	Read-across
95-96-5	Dilactide	Read-across
96-18-4	1,2,3-trichloropropane	Genotox risk
96-34-4	Methyl chloroacetate	No Tox Data
96-37-7	Methylcyclopentane	No Tox Data
97-00-7	1-Chloro-2,4-dinitrobenzene	Genotox risk
97-85-8	2-methylpropyl 2-methylpropanoate	No Tox Data
98-00-0	furan-2-ylmethanol	No Tox Data
98-57-7	4-Chlorophenyl methyl sulfone	No Tox Data
98-88-4	Benzoyl chloride	No Tox Data
109-06-8	2-methyl-pyridine	No Tox Data
115-83-3	Pentaerythritol tetrastearate	Read-across
13361-34-7	2-ethylhexyl cyanoacetate	No Tox Data
133978-15-1	2-octylcyanoacrylate	No Tox Data
20292-08-4	2-ethylhexyl laurate	Read-across
2228-98-0	4-(1,1-diemthylethyl)-cyclohexene	No Tox Data
2399-48-6	Tetrahydrofurfuryl acrylate	Read-across
29806-73-3	2-ethylhexyl palmitate	Read-across
147783-69-5	Sanduvor PR-31	No Tox Data
161717-32-4	Ultranox 641	No Tox Data
178671-58-4	Uvinul 3030	No Tox Data
3049-71-6	C.I. Pigment Red 178	Read-across
40618-31-3	Pigment red 214	Read-across
4196-89-8	Neopentyl glycol dibenzoate	Read-across
5280-78-4	Pigment Red 144	Read-across
90498-90-1	Sumilizer GA 80	No Tox Data
91788-83-9	1,2,3,4-Tetrakis(1,2,2,6,6-pentamethyl-4-piperidinyl) 1,2,3,4-butanetetracarboxylate	No Tox Data
97416-84-7	1,1'-(Isopropylidene)bis(3,5-dibromo-4-(2,3-dibromo-2-methylpropoxy)benzene)	Read-across
85099-50-9	Tetradecyl 2,2,4,4-tetramethyl-21-oxo-7-oxa-3,20-diazadispiro[5.1.11.2]heneicosane-20-propanoate	No Tox Data
212070-45-6	Ceramide 6	No Tox Data
102-69-2	Tripropylamine	Read-across
134-84-9	4-Methylbenzophenone	Read-across
67-51-6	3,5-Dimethylpyrazole	Read-across
25111-05-1	9-Octadecenoic acid (9Z)-, 1,1′-[2-ethyl-2-(hydroxymethyl)-1,3-propanediyl] ester	Read-across
42222-50-4	1,1′-(2,2-Dimethyl-1,3-propanediyl) di-(9Z)-9-octadecenoate	Read-across
98283-67-1	Undecyl D-glucopyranoside	Read-across
103597-45-1	2,2′-Methylenebis[6-(2H-benzotriazol-2-yl)-4-(1,1,3,3-tetramethylbutyl)phenol]	No Tox Data
118337-09-0	Ethanox 398	No Tox Data
121-71-1	1-(3-Hydroxyphenyl)ethanone	No Tox Data
145052-34-2	Bis(2,6-dimethoxybenzoyl)(2,4,4-trimethylpentyl)phosphine oxide	No Tox Data
1623-08-1	Dibenzyl hydrogen phosphate	No Tox Data
19406-86-1	3-Amino-4-methylbenzamide	No Tox Data
19719-28-9	Dichlorophenylacetic acid	No Tox Data
26496-99-1	Bis(2,4-dichlorophenyl) carbonate	No Tox Data
478556-66-0	Irgacure OXE 02	No Tox Data
5280-68-2	Pigment Red 146	No Tox Data
57609-64-0	Propane-1,3-diyl bis(4-aminobenzoate)	No Tox Data
59272-84-3	Myristamidopropyl betaine	No Tox Data
673456-49-0	1,2,4,5,8,9-Hexabromocyclododecane	No Tox Data
80410-33-9	Irgafos 12	No Tox Data
88-05-1	Mesitylamine	No Tox Data
122-52-1	Triethyl phosphite	No Tox Data
100-01-6	4-Nitroaniline	Genotox risk
100-61-8	N-Methylaniline	Genotox risk
101-14-4	4,4'-Methylenebis(2-chloroaniline)	Genotox risk
101-90-6	Resorcinol diglycidyl ether	Genotox risk
103-36-6	Ethyl cinnamate	Read-across
104-67-6	2(3H)-Furanone, 5-heptyldihydro-	Read-across
105-53-3	Diethyl malonate	Read-across
105-87-3	Geranyl acetate	No Tox Data
108-24-7	Acetic anhydride	Read-across
108-91-8	Cyclohexylamine	Read-across
1120-71-4	1,3-Propanesultone	Genotox risk
1122-58-3	4-(Dimethylamino)pyridine	No Tox Data
115-07-1	Propene	No Tox Data
116-09-6	1-Hydroxyacetone	Genotox risk
1185-53-1	Tris-Hydrochloride (Tris-Chlorhydrate)	Read-across
123-75-1	Pyrrolidine	No Tox Data
18085-02-4	3,4-Diacetoxy-1-butene	Genotox risk
18479-57-7	2-Octanol, 2,6-dimethyl-	Read-across
108-63-4	1,6-Bis(1-methylheptyl) hexanedioate	Genotox risk
2224-15-9	Ethylene glycol diglycidyl ether	Genotox risk
2370-63-0	2-Ethoxyethyl methacrylate	Genotox risk
24347-58-8	(2R,3R)-Butanediol	Read-across
2437-25-4	Dodecanenitrile	No Tox Data
24424-99-5	di-tert-Butyl dicarbonate	Read-across
2517-43-3	1-Butanol, 3-methoxy-	Read-across
2778-96-3	Octadecanoic acid, octadecyl ester	Read-across
3179-47-3	2-Propenoic acid, 2-methyl-, decyl ester	Read-across
3913-02-8	1-Octanol, 2-butyl-	Read-across
3926-62-3	Sodium chloroacetate	Read-across
420-46-2	Ethane, 1,1,1-trifluoro-	No Tox Data
464-45-9	(-)-Borneol	Read-across
506-51-4	1-Tetracosanol	Read-across
51-28-5	2,4-Dinitrophenol	Genotox risk
629-96-9	1-Eicosanol	Read-across
63-68-3	L-Methionine	No Tox data
6528-34-3	Pigment yellow 65	Read-across
68227-78-1	Pigment Red 147	Read-across
7300-34-7	1,4-Bis(3-aminopropoxy)butane	Read-across
74-95-3	Dibromomethane	Genotox risk
75-01-4	Vinyl chloride	Genotox risk
75-35-4	1,1-Dichloroethene	Genotox risk
75-38-7	Ethene, 1,1-difluoro-	No Tox Data
78-78-4	2-Methylbutane	Read-across
79-97-0	Bisphenol C	Genotox risk
80-15-9	Hydroperoxide, 1-methyl-1-phenylethyl	Genotox risk
87-66-1	Pyrogallol	Genotox risk
88-72-2	2-Nitrotoluene	Genotox risk
88-74-4	2-Nitroaniline	Genotox risk
91-22-5	Quinoline	Genotox risk
97-63-2	Ethyl methacrylate	Read-across
97-72-3	Isobutyric anhydride	Read-across
999-97-3	Hexamethyldisilazane	Read-across
136-85-6	5-Methylbenzotriazole	No Tox Data
2295-31-0	2,4-Thiazolidinedione	No Tox Data
3179-31-5	3H-1,2,4-Triazole-3-thione, 1,2-dihydro-	No Tox Data
4418-61-5	2H-Tetrazol-5-amine	No Tox Data
92-71-7	Oxazole, 2,5-diphenyl-	No Tox Data
584-13-4	4H-1,2,4-Triazol-4-amine	No Tox Data
930-33-6	3H-1,2,4-Triazol-3-one, 1,2-dihydro-	No Tox Data
509-34-2	Solvent Red 49	Read-across
713-95-1	2H-Pyran-2-one, 6-heptyltetrahydro-	Read-across
5131-58-8	4-Nitro-m-phenylenediamine	No Tox Data
2116-84-9	PHENYLTRIS(TRIMETHYLSILOXY)SILANE	No Tox Data
75-76-3	Silane, tetramethyl-	No Tox Data
1112-39-6	Dimethoxydimethylsilane	Genotox risk
112-04-9	Silane, trichlorooctadecyl-	No Tox Data
100-10-7	4-(Dimethylamino)benzaldehyde	No Tox Data
1009-14-9	Valerophenone	No Tox Data
100-93-6	4'-anilino-p-toluenesulfonanilide	No Tox Data
106-31-0	Butanoic acid, anhydride	No Tox Data
106-36-5	Propanoic acid, propyl ester	No Tox Data
106-68-3	3-Octanone	No Tox Data
106-69-4	1,2,6-Hexanetriol	No Tox Data
106-93-4	1,2-Dibromoethane	No Tox Data
107-12-0	Propionitrile	No Tox Data
107-93-7	trans-Crotonic Acid	No Tox Data
108-62-3	Metaldehyde	No Tox Data
110-40-7	Diethylsebacate	No Tox Data
110-87-2	3,4-Dihydro-2H-pyran	No Tox Data
111-85-3	1-Chlorooctane	No Tox Data
123-08-0	4-Hydroxybenzaldehyde	No Tox Data
123-15-9	(±)-2-Methylpentanal	No Tox Data
123-54-6	Acetylacetone	No Tox Data
125-20-2	Thymolphthalein	No Tox Data
126-91-0	(-)-Linalool	No Tox Data
126-99-8	Chloroprene	No Tox Data
131-53-3	2,2'-Dihydroxy-4-methoxybenzophenone	No Tox Data
140-04-5	Butyl acetyl ricinoleate	No Tox Data
140-10-3	trans-Cinnamic acid	No Tox Data
140-67-0	4-Allylanisole	No Tox Data
1538-75-6	Trimethylacetic anhydride	No Tox Data
15647-11-7	Cyclohexanol, 3-(aminomethyl)-3,5,5-trimethyl-	No Tox Data
1587-20-8	Trimethyl citrate	No Tox Data
16024-58-1	Acetic acid, 2-[2-(2-methoxyethoxy)ethoxy]-	No Tox Data
1618-26-4	Bis(methylthio)methane	No Tox Data
1644-11-7	Propane, 1-[1-[difluoro[(1,2,2-trifluoroethenyl)oxy]methyl]-1,2,2,2-tetrafluoroethoxy]-1,1,2,2,3,3,3-heptafluoro-	No Tox Data
17261-28-8	2-(Diphenylphosphino)benzoic acid	No Tox Data
1732-10-1	Dimethyl azelate	No Tox Data
18748-98-6	Stearyloxytrimethylsilane	No Tox Data
2082-59-9	Valeric anhydride	No Tox Data
2110-78-3	Methyl 2-Hydroxyisobutyrate	No Tox Data
2177-70-0	2-Propenoic acid, 2-methyl-, phenyl ester	No Tox Data
21862-63-5	Cyclohexanol, 4-(1,1-dimethylethyl)-, trans-	No Tox Data
26530-20-1	2-Octyl-4-isothiazolin-3-one	No Tox Data
2855-27-8	Cyclohexane, 1,2,4-triethenyl-	No Tox Data
29976-53-2	Ethyl 4-oxo-1-piperidinecarboxylate	No Tox Data
30315-46-9	(2S)-3-[(1,1-Dimethylethyl)amino]-1,2-propanediol	No Tox Data
3068-76-6	N-[3-(Trimethoxysilyl)propyl]aniline	No Tox Data
3090-56-0	2-Hydroxyethyl vinyl sulfide	No Tox Data
3396-11-0	Acetic acid, cesium salt	No Tox Data
3612-20-2	4-Piperidinone, 1-(phenylmethyl)-	No Tox Data
371-41-5	Phenol, 4-fluoro-	No Tox Data
37609-25-9	5-Cyclohexadecen-1-one	No Tox Data
3891-07-4	N-(2-Hydroxyethyl)phthalimide	No Tox Data
407-25-0	Acetic acid, trifluoro-, anhydride	No Tox Data
4345-03-3	Vitamin E succinate	No Tox Data
486-25-9	9-Fluorenone	No Tox Data
50-01-1	Guanidine hydrochloride	No Tox Data
504-53-0	18-Pentatriacontanone	No Tox Data
505-52-2	1,11-Undecanedicarboxylic acid	No Tox Data
505-84-0	Methane, dipropoxy-	No Tox Data
55349-01-4	N,N′-1,6-Hexanediylbis[12- hydroxyoctadecanamide]	No Tox Data
554-12-1	Methyl propanoate	No Tox Data
56-54-2	(+)-Quinidine	No Tox Data
5655-61-8	Bicyclo[2.2.1]heptan-2-ol, 1,7,7-trimethyl-, acetate, (1S-endo)-	No Tox Data
599-04-2	D-Pantolactone	No Tox Data
600-14-6	2,3-Pentanedione	No Tox Data
603-48-5	Leucocrystal Violet	No Tox Data
611-99-4	4,4'-Dihydroxybenzophenone	No Tox Data
617-35-6	Propanoic acid, 2-oxo-, ethyl ester	No Tox Data
61792-31-2	Laurylamidopropyldimethylamine oxide	No Tox Data
618-83-7	1,3-Benzenedicarboxylic acid, 5-hydroxy-	No Tox Data
624-03-3	Ethylene dipalmitate	No Tox Data
6284-40-8	N-Methyl-D-glucamine	No Tox Data
628-81-9	Ethyl n-butyl ether	No Tox Data
67-72-1	Hexachloroethane	No Tox Data
6902-77-8	(+)-Genipin	No Tox Data
693-21-0	Diethylene glycol dinitrate	No Tox Data
6938-94-9	Diisopropyl adipate	No Tox Data
75-97-8	2-Butanone, 3,3-dimethyl-	No Tox Data
762-26-5	4,8-Decadienal, 5,9-dimethyl-	No Tox Data
7783-61-1	Silicon tetrafluoride	No Tox Data
77-95-2	D-(-)-Quinic acid	No Tox Data
78-39-7	1,1,1-Triethoxyethane	No Tox Data
79-46-9	2-Nitropropane	No Tox Data
80-71-7	2-Hydroxy-3-methyl-2-cyclopenten-1-one	No Tox Data
821-38-5	Tetradecanedioic acid	No Tox Data
84-72-0	Ethyl phthalyl ethyl glycolate	No Tox Data
873-74-5	4-Aminobenzonitrile	No Tox Data
877-24-7	Potassium hydrogen phthalate	No Tox Data
91-16-7	1,2-Dimethoxybenzene	No Tox Data
95-13-6	Indene	No Tox Data
96-09-3	Oxirane, phenyl-	No Tox Data
4098-71-9	Isophorone diisocyanate	No Tox Data
579-75-9	2-Methoxybenzoic acid	No Tox data
58543-16-1	Rebaudioside A	No Tox data
624-92-0	Disulfuide, dimethyl	No Tox data
75-00-3	Chloroethane	No Tox data
7665-72-7	2-[(1,1-Dimethylethoxy)methyl]oxirane	No Tox Data
105-38-4	Propanoic acid, ethenyl ester	No Tox Data
110-38-3	Decanoic acid, ethyl ester	Read-across
112-55-0	1-Dodecanethiol	Read-across
122-84-9	4-Methoxyphenylacetone	No Tox Data
123-62-6	Propanoic acid, anhydride	Read-across
13241-33-3	Neohesperidin	Read-across
137-32-6	1-Butanol, 2-methyl-	Read-across
139-08-2	Benzyldimethyltetradecylammoniumchloride	Read-across
13952-84-6	sec-Butylamine	Read-across
14073-97-3	Cyclohexanone, 5-methyl-2-(1-methylethyl)-, (2S,5R)-	Read-across
142-16-5	2-Butenedioic acid (2Z)-, 1,4-bis(2-ethylhexyl) ester	Read-across
142-92-7	Acetic acid, hexyl ester	Read-across
143-28-2	9-Octadecen-1-ol, (9Z)-	Read-across
1445-45-0	Trimethyl orthoacetate	Read-across
149-87-1	DL-Pyroglutamic acid	Read-across
16587-71-6	4-tert-Pentylcyclohexanone	Read-across
17661-50-6	Stearic acid, tetradecyl ester	Read-across
18835-34-2	1-Octacosene	Read-across
2052-49-5	Tetrabutylammonium hydroxide	Read-across
26399-02-0	9-Octadecenoic acid (9Z)-, 2-ethylhexyl ester	Read-across
3007-53-2	N,N-Dimethyldodecanamide	Read-across
3088-31-1	2-(2-Dodecyloxyethoxy)ethyl sodium sulfate	Read-across
3234-28-4	1,2-Epoxytetradecane	Read-across
32360-05-7	2-Propenoic acid, 2-methyl-, octadecyl ester	Read-across
36078-10-1	9-Octadecenoic acid (Z)-, dodecyl ester	Read-across
460-00-4	1-Bromo-4-fluorobenzene	Read-across
50-85-1	4-Methylsalicylic acid	Read-across
5324-84-5	1-octane sulfonic acid	Read-across
5413-60-5	4,7-Methano-1H-inden-6-ol, 3a,4,5,6,7,7a-hexahydro-, acetate	Read-across
56-86-0	L-Glutamic acid	Read-across
590-29-4	Formic acid, potassium salt	Read-across
6635-20-7	Benzaldehyde, 4-hydroxy-3-methoxy-5-nitro-	Read-across
687-47-8	Propanoic acid, 2-hydroxy-, ethyl ester, (L)-	Read-across
695-06-7	2(3H)-Furanone, 5-ethyldihydro-	Read-across
7779-31-9	2-Propenoic acid, 2-methyl-, 3,3,5-trimethylcyclohexyl ester	Read-across
82799-44-8	2,4-Diethyl-9H-thioxanthen-9-one	Read-across
